# Supplementary material for: The Mediating Role of Cognitive Flexibility in the Relationship between University Students' Attitudes Towards Violence Against Women and Self-Efficacy Levels
Source: Research Square preprint supplement (doi:10.21203/rs.3.rs-6536153/v1), 2025-05-30
Supplement: Supplementary file 1 [file 64b820280591d9a9fb13a9e2.docx]

**INFORMATION FORM**

1. Age………………………….
2. Gender ( ) Women ( ) Men
3. Marital status ( ) Married ( ) Unmarried
4. People you live with

( ) Alone-at home ( ) With mother/father

( ) At home with friends ( ) In the dormitory

( ) With spouse/children

( ) Others:………………

1. Where you mostly live ( ) Province District ( ) Town ( ) Village ( )
2. Your part-time employment status ( ) Yes ( ) No
3. Your family income levels

( ) Income more than expenditure ( ) Income equals expenditure

( ) Income less than expenditure

1. Do you smoke/alcohol use?

Smoke ( ) Yes ( ) No

Alcohol ( ) Yes ( ) No

1. Do you have a chronic disease?

( ) Yes…………………………………………………………………………………..

( ) No

1. School

( ) Faculty of Health Sciences ( ) Vocational School of Health Services

1. Your department ……………………………………………………

**VIOLENCE AGAINST WOMEN ATTITUDE SCALE**

**(ISKEBE ATTITUDE SCALE)**

| Dear participant; below are the items that include attitudes towards violence against women. Please evaluate each item and check the box that you think is most appropriate for you. | | | | | | |
| --- | --- | --- | --- | --- | --- | --- |
|  | **VIOLENCE AGAINST WOMEN ATTITUDE SCALE**  **(ISKEBE ATTITUDE SCALE)** | **Completely**  **Agree** | **Agree** | **Undecided** | **Disagree** | **Never**  **Disagree** |
| **1** | A woman should get permission from her husband when she goes somewhere. | 1 | 2 | 3 | 4 | 5 |
| **2** | When a woman gets married, she should take her husband's surname. | **1** | **2** | **3** | **4** | **5** |
| **3** | “He is your husband. He loves and beats”. | 1 | 2 | 3 | 4 | 5 |
| **4** | A woman who is sexually harassed is at fault. | **1** | **2** | **3** | **4** | **5** |
| **5** | The woman does not have to be under the control of the man. | 1 | 2 | 3 | 4 | 5 |
| **6** | The woman's spending should be under the man's control. | **1** | **2** | **3** | **4** | **5** |
| **7** | Women should not go alone to places where men are concentrated. | 1 | 2 | 3 | 4 | 5 |
| **8** | I think beating is a good means of discipline. | **1** | **2** | **3** | **4** | **5** |
| **9** | A woman has to have intercourse with her husband, even if she does not want to. | 1 | 2 | 3 | 4 | 5 |
| **10** | I believe that a man has good reasons for beating a woman. | **1** | **2** | **3** | **4** | **5** |
| **11** | I do not think it is right for women to work in a predominantly male workplace. | 1 | 2 | 3 | 4 | 5 |
| **12** | I excuse beatings as long as they are not severe. | **1** | **2** | **3** | **4** | **5** |
| **13** | The man should decide on financial matters in the family. | 1 | 2 | 3 | 4 | 5 |
| **14** | It is normal for women to be teased. | **1** | **2** | **3** | **4** | **5** |
| **15** | A woman should have sexual intercourse as the man wishes, even if she does not want to. | 1 | 2 | 3 | 4 | 5 |
| **16** | I think that murders committed in the name of honor are justified. | **1** | **2** | **3** | **4** | **5** |
| **17** | A woman should give birth to a child, even if she doesn't want to, just because the man wants her to. | 1 | 2 | 3 | 4 | 5 |
| **18** | A woman should not work if the man does not want her to. | **1** | **2** | **3** | **4** | **5** |
| **19** | A man is justified in not allowing a woman to leave the house when he deems it necessary. | 1 | 2 | 3 | 4 | 5 |
| **20** | If the degree of physical violence is not severe, I justify violence. | **1** | **2** | **3** | **4** | **5** |
| **21** | I find it wrong for women to stay out late. | 1 | 2 | 3 | 4 | 5 |
| **22** | It is normal for a woman walking alone to be spoken to. | **1** | **2** | **3** | **4** | **5** |
| **23** | I find it wrong for women to work in every sector. | 1 | 2 | 3 | 4 | 5 |
| **24** | I find it normal for a married woman to have male friends. | **1** | **2** | **3** | **4** | **5** |
| **25** | If a woman does not obey, beating her will solve the problem. | 1 | 2 | 3 | 4 | 5 |
| **26** | I think some women deserve verbal abuse. | **1** | **2** | **3** | **4** | **5** |
| **27** | A woman should not wear a garment that a man does not allow her to wear. | 1 | 2 | 3 | 4 | 5 |
| **28** | It is natural for a woman to be harassed when she is out late. | **1** | **2** | **3** | **4** | **5** |
| **29** | If the man earns enough money, the woman does not need to work. | 1 | 2 | 3 | 4 | 5 |
| **30** | I think that the reason for physical violence against women is the woman herself. | **1** | **2** | **3** | **4** | **5** |

**COGNITIVE FLEXILITY SCALE**

|  | **Completely**  **Agree** | **Agree** | **Partıally Agree** | **Partıally Dısagree** | **Dısagree** | **Strongly Dısagree** |
| --- | --- | --- | --- | --- | --- | --- |
| 1. I can express an idea/thought in many different ways. | 6 | 5 | 4 | 3 | 2 | 1 |
| 2. I avoid new and unfamiliar situations. | 6 | 5 | 4 | 3 | 2 | 1 |
| 3. I feel like I can never make a decision about anything. (about the future, while shopping, with the opposite sex, etc.) | 6 | 5 | 4 | 3 | 2 | 1 |
| 4. I can act appropriately in every situation. | 6 | 5 | 4 | 3 | 2 | 1 |
| 5. I can find useful solutions to seemingly unsolvable problems | 6 | 5 | 4 | 3 | 2 | 1 |
| 6. I cannot develop different perspectives when deciding how to behave. | 6 | 5 | 4 | 3 | 2 | 1 |
| 7. I can find creative solutions to problems. | 6 | 5 | 4 | 3 | 2 | 1 |
| 8. My behavior is a result of my conscious decisions. | 6 | 5 | 4 | 3 | 2 | 1 |
| 9. I can behave in different ways in any situation. | 6 | 5 | 4 | 3 | 2 | 1 |
| 10. I find it difficult to use my knowledge in my real life. | 6 | 5 | 4 | 3 | 2 | 1 |
| 11.When I am trying to overcome a problem, I like to get and evaluate the opinions of people around me. | 6 | 5 | 4 | 3 | 2 | 1 |
| 12. I have confidence in trying to do a job in different ways. | 6 | 5 | 4 | 3 | 2 | 1 |

**GENERAL SELF- EFFICACY SCALE**

|  | **Very Good** | **Good** | **Medium** | **Low** | **None** |
| --- | --- | --- | --- | --- | --- |
| 1. When I make plans, I am confident that I can carry them out. | 5 | 4 | 3 | 2 | 1 |
| 2. One of my problems is that I cannot start a job on time. | 5 | 4 | 3 | 2 | 1 |
| 3. If I cannot do something on the first try, I try until I succeed. | 5 | 4 | 3 | 2 | 1 |
| 4. I am not very successful in achieving the important goals I set. | 5 | 4 | 3 | 2 | 1 |
| 5. I leave everything unfinished. | 5 | 4 | 3 | 2 | 1 |
| 6. I avoid facing difficulties. | 5 | 4 | 3 | 2 | 1 |
| 7. If a task seems too complicated, I don't even try it. | 5 | 4 | 3 | 2 | 1 |
| 8. When I have to do something, I don't like pushing myself until I finish. | 5 | 4 | 3 | 2 | 1 |
| 9. When I decide to do something, I start working immediately. | 5 | 4 | 3 | 2 | 1 |
| 10. When trying something new, if I don't succeed at the beginning, I quickly give up | 5 | 4 | 3 | 2 | 1 |
| 11. When I face unexpected problems, I can easily overcome them I can't come. | 5 | 4 | 3 | 2 | 1 |
| 12. I avoid trying to learn new things that seem difficult to me. | 5 | 4 | 3 | 2 | 1 |
| 13. Failure increases my determination. | 5 | 4 | 3 | 2 | 1 |
| 14. I am not always very confident in my abilities | 5 | 4 | 3 | 2 | 1 |
| 15. I am a self-confident person | 5 | 4 | 3 | 2 | 1 |
| 16. I give up easily. | 5 | 4 | 3 | 2 | 1 |
| 17. I can cope with most of the problems I will face in life, I don't think so. | 5 | 4 | 3 | 2 | 1 |
